# Supplementary material for: Spatial Profile of Tumor Microenvironment in PD-L1-Negative and PD-L1-Positive Triple-Negative Breast Cancer
Source: MDPI journal article supplement (doi:10.3390/ijms24021433), 2023-01-11
Supplement: s1 [file s1]

Table S1. Morphological annotation and marker genes of clusters in breast cancer tissues

| Patient | Morphological annotation of clusters / Marker genes                                                           |                                                                                                    |                                                                                                |                                                                                                               |                                                                                               |                                                                                           |                                                                             |                                                                                    |                                                                            |            |
|---------|---------------------------------------------------------------------------------------------------------------|----------------------------------------------------------------------------------------------------|------------------------------------------------------------------------------------------------|---------------------------------------------------------------------------------------------------------------|-----------------------------------------------------------------------------------------------|-------------------------------------------------------------------------------------------|-----------------------------------------------------------------------------|------------------------------------------------------------------------------------|----------------------------------------------------------------------------|------------|
|         | Cluster 1                                                                                                     | Cluster 2                                                                                          | Cluster 3                                                                                      | Cluster 4                                                                                                     | Cluster 5                                                                                     | Cluster 6                                                                                 | Cluster 7                                                                   | Cluster 8                                                                          | Cluster 9                                                                  | Cluster 10 |
| 1       | Invasive cancer /<br>MUCL1<br>SCGB3A1<br>SCGB2B2<br>CD24                                                      | Invasive cancer, adipose tissue and connective tissue / UPK1A<br>HPD<br>MUC6<br>KRT7               | Invasive cancer, adipose tissue and connective tissue / CD36<br>SCGB3A1<br>TXNIP<br>PLAAT4     | Connective tissue /<br>COL1A2<br>CRIP1<br>S100A8<br>GLUL                                                      | Adipose tissue /<br>SERPINE1<br>PLPP1                                                         | Invasive cancer and connective tissue / STAC2<br>HPGD<br>S100A7<br>CXCL13                 | Immune infiltrate /<br>CD74<br>CST3<br>HLA-DRA<br>C3                        | Connective tissue /<br>IGHG3<br>CD74<br>HLA-DRA                                    |                                                                            |            |
| 2       | Invasive cancer, immune infiltrate and connective tissue /<br>CXCL8<br>CXCL10<br>CHI3L2<br>KRT7               | Invasive cancer, immune infiltrate and connective tissue / CD44<br>VEGFA<br>CD24<br>CDH1           | Invasive cancer, necrosis, immune infiltrate and connective tissue / NDRG1<br>COL6A1           | Invasive cancer and connective tissue /<br>CCL21<br>JCHAIN<br>SFRP4<br>COL1A2                                 | Invasive cancer and connective tissue                                                         | Invasive cancer and connective tissue / SAA2<br>SERPINA3<br>SRSF2<br>IGHA1                | Invasive cancer and immune infiltrate /<br>CD74<br>LYZ<br>HLA-DRA<br>COL4A1 | Invasive cancer and immune infiltrate /<br>HLA-DPA1<br>HLA-DPB1<br>CD163<br>LAPTM5 | Invasive cancer, necrosis and connective tissue                            |            |
| 3       | Invasive cancer, immune infiltrate and connective tissue /<br>PROM1<br>CD151<br>KLK6<br>DSC3<br>KRT7<br>EPCAM | Invasive cancer, immune infiltrate and connective tissue / MMP7<br>KRT14<br>PTMS<br>CRABP1<br>CD24 | Invasive cancer, immune infiltrate and connective tissue / CD74<br>TIMP1<br>HLA-DRA<br>IGLV3-1 | Invasive cancer, immune infiltrate and connective tissue /<br>CXCL13<br>HLA-DPB1<br>HLA-DRA<br>IGHA1<br>PTPRC | Invasive cancer, immune infiltrate and connective tissue /<br>S100A10<br>SDC1<br>CRYAB<br>MGP | Invasive cancer, immune infiltrate and connective tissue / MLF2<br>LAD1<br>SPIB<br>CHI3L2 | Immune infiltrate, single tumor cells / LTF<br>S100A9<br>S100A8<br>CSTB     | Immune infiltrate /<br>COL11A1<br>HLA-DPA1<br>HLA-DRA<br>CDH11                     | Immune infiltrate and normal glands /<br>COL6A1<br>COL3A1<br>FN1<br>COL5A1 | Vessels    |
| 4       | Invasive cancer, immune                                                                                       | Invasive cancer, immune infiltrate and                                                             | Immune infiltrate, single                                                                      | Immune infiltrate,                                                                                            | Connective tissue / IL6<br>CD34                                                               | Connective tissue /<br>CXCL13                                                             | Vessels /<br>COL1A1<br>DCN                                                  |                                                                                    |                                                                            |            |

|   |                                                                                                             |                                                                                               |                                                                                     |                                                                                                                |                                                                                |                                                                                                      |                                                                           |                                                                                  |                                                                 |  |
|---|-------------------------------------------------------------------------------------------------------------|-----------------------------------------------------------------------------------------------|-------------------------------------------------------------------------------------|----------------------------------------------------------------------------------------------------------------|--------------------------------------------------------------------------------|------------------------------------------------------------------------------------------------------|---------------------------------------------------------------------------|----------------------------------------------------------------------------------|-----------------------------------------------------------------|--|
|   | infiltrate and connective tissue / CD79B IGHA1 GZMB CD28 CD22                                               | connective tissue / KRT81 KRT16 KRT7 IL32                                                     | tumor cells / IGHG1 SERPINA1 IGLV3-1 CXCL14                                         | single tumor cells / KRT7 LTF CD44 CD24                                                                        | TGFBR2 CXCL12                                                                  | HLA-DRA CD74 CD52                                                                                    | C3 CCL2                                                                   |                                                                                  |                                                                 |  |
| 5 | Connective tissue / DCN SELENOP IGHA1 CXCL12                                                                | Tertiary lymphoid structures / CD19 CD22 CD72 CD79B                                           | Connective tissue, immune infiltrate and normal glands / PIGR EEF2 APOD CXCL2 SFRP1 | Connective tissue and normal glands / C1S C3 CCDC80 DCN                                                        | Invasive cancer / KRT16 KRT6B KRT81 MMP1                                       | Connective tissue and single tumor cells / CD28 CD37 CD3D CD3E PTPRC                                 | Invasive cancer (tumor-stroma border) / CXCL10 HLA-DRA COL1A1 CXCL11 CD74 | Invasive cancer inside tertiary lymphoid structures / IL1R2 IL22RA2 CHI3L2 KRT15 | Adipose tissue and connective tissue / CD163 CD63 COL1A1 COL1A2 |  |
| 6 | Invasive cancer, immune infiltrate, connective tissue, normal glands and necrosis / COL1A2 SPARC FN1 COL6A3 | Invasive cancer, immune infiltrate, connective tissue and necrosis / KLK5 KRT15 CALML5 CX3CL1 | Connective tissue and normal glands / FOSB FOS                                      | Connective tissue, invasive carcinoma, tertiary lymphoid structures and normal glands / IGLC1 IGHG1 IGHG2 IGKC | Connective tissue, invasive carcinoma and normal glands / KRT8 KRT7 CD24 PROM1 | Connective tissue, invasive carcinoma and tertiary lymphoid structures / MMP7 PIGR S100A9 ALCAM CD24 |                                                                           |                                                                                  |                                                                 |  |
