# Supplementary material for: Spatial Profile of Tumor Microenvironment in PD-L1-Negative and PD-L1-Positive Triple-Negative Breast Cancer
Source: MDPI journal article supplement (doi:10.3390/ijms24021433), 2023-01-11
Supplement: s1 [file s1]

Table S2. GO terms in tissue clusters of PD-L1-negative and PD-L1-positive triple-negative breast cancer

| Cluster number | PD-L1-negative cases                                                                                                                                                                                                               |   |                                                                                                                                                                                                                 | PD-L1-positive cases                                                                                                                                 |                                                                                                                                                                                         |                                                                                                           |
|----------------|------------------------------------------------------------------------------------------------------------------------------------------------------------------------------------------------------------------------------------|---|-----------------------------------------------------------------------------------------------------------------------------------------------------------------------------------------------------------------|------------------------------------------------------------------------------------------------------------------------------------------------------|-----------------------------------------------------------------------------------------------------------------------------------------------------------------------------------------|-----------------------------------------------------------------------------------------------------------|
|                | 1                                                                                                                                                                                                                                  | 2 | 3                                                                                                                                                                                                               | 4                                                                                                                                                    | 5                                                                                                                                                                                       | 6                                                                                                         |
| 1              | <p>cell migration involved in sprouting angiogenesis (GO:0002042)<br/>p = 0.024</p> <p>negative regulation of cell cycle (GO:0045786)<br/>p = 0.047</p> <p>positive regulation of apoptotic process (GO:0043065)<br/>p = 0.047</p> |   | <p>neutrophil activation involved in immune response (GO:0002283)<br/>p = 3.62E-4</p>                                                                                                                           |                                                                                                                                                      | <p>extracellular matrix organization (GO:0030198)<br/>p = 3.54E-7</p> <p>positive regulation of cell motility (GO:2000147)<br/>p = 1.63E-4</p>                                          |                                                                                                           |
| 2              | -                                                                                                                                                                                                                                  |   | <p>negative regulation of angiogenesis (GO:0016525)<br/>p = 2.61E-5</p> <p>regulation of cell migration (GO:0030334)<br/>p = 0.0012</p>                                                                         | <p>regulation of cell population proliferation (GO:0042127)<br/>p = 0.024</p> <p>negative regulation of cell motility (GO:2000146)<br/>p = 0.024</p> | <p>B cell activation (GO:0042113)<br/>p = 2.37E-7</p> <p>lymphocyte differentiation (GO:0030098)<br/>p = 2.73E-6</p> <p>T-helper cell lineage commitment (GO:0002295)<br/>p = 0.009</p> |                                                                                                           |
| 3              | <p>antigen processing and presentation of exogenous peptide antigen (GO:0002478)<br/>p = 1.44E-10</p> <p>positive regulation of cytokine production (GO:0001819)<br/>p = 1.399E-7</p>                                              |   | <p>cytokine-mediated signaling pathway (GO:0019221)<br/>p = 4.54E-10</p> <p>negative regulation of programmed cell death (GO:0043069)<br/>p = 5.20E-4</p> <p>antigen processing and presentation of peptide</p> |                                                                                                                                                      | <p>extracellular matrix organization (GO:0030198)<br/>p = 3.16E-4</p> <p>regulation of insulin-like growth factor receptor signaling pathway (GO:0043567)<br/>p = 0.0024</p>            | <p>cellular response to type I interferon (GO:0071357)<br/>p = 3.15E-10</p> <p>positive regulation of</p> |

|   |                                                                                                                                              |                                                                                                                                                                                                                                                                                                                                                                                                   |                                                                                                                                 |                                                          |                                                                                                                                                                                                                                                                                                                                            |                                                                                                                                                                                                                                                                                                                                                                  |
|---|----------------------------------------------------------------------------------------------------------------------------------------------|---------------------------------------------------------------------------------------------------------------------------------------------------------------------------------------------------------------------------------------------------------------------------------------------------------------------------------------------------------------------------------------------------|---------------------------------------------------------------------------------------------------------------------------------|----------------------------------------------------------|--------------------------------------------------------------------------------------------------------------------------------------------------------------------------------------------------------------------------------------------------------------------------------------------------------------------------------------------|------------------------------------------------------------------------------------------------------------------------------------------------------------------------------------------------------------------------------------------------------------------------------------------------------------------------------------------------------------------|
|   |                                                                                                                                              |                                                                                                                                                                                                                                                                                                                                                                                                   | antigen via MHC class I<br>(GO:0002474)<br>p = 0.011                                                                            |                                                          | positive regulation of cell<br>motility (GO:2000147)<br>p = 0.004                                                                                                                                                                                                                                                                          | fibroblast<br>proliferation<br>(GO:0048146)<br>)<br>p = 7.29E-4                                                                                                                                                                                                                                                                                                  |
| 4 | extracellular matrix<br>organization<br>(GO:0030198)<br>p = 1.31E-29<br>negative regulation of cell<br>migration (GO:0030336)<br>p = 4.12E-4 | extracellular<br>matrix<br>organization<br>(GO:0030198)<br>)<br>p = 1.95E-26<br>negative<br>regulation of<br>angiogenesis<br>(GO:0016525)<br>)<br>p = 6.30E-8<br>cytokine-<br>mediated<br>signaling<br>pathway<br>(GO:0019221)<br>)<br>p = 4.846E-4<br>antigen<br>processing<br>and<br>presentation<br>of exogenous<br>peptide<br>antigen via<br>MHC class II<br>(GO:0019886)<br>)<br>p = 4.03E-4 | extracellular structure<br>organization (GO:0043062)<br>p = 0.0033<br>regulation of cell migration<br>(GO:0030334)<br>p = 0.013 | defense response to<br>virus (GO:0051607)<br>p = 9.63E-6 | positive regulation of cell<br>population proliferation<br>(GO:0008284)<br>p = 2.23E-6<br>negative regulation of<br>apoptotic process<br>(GO:0043066)<br>p = 8.15E-4<br>negative regulation of<br>epithelial to mesenchymal<br>transition (GO:0010719)<br>p = 0.0016<br>positive regulation of cell<br>motility (GO:2000147)<br>p = 0.0018 | cytokine-<br>mediated<br>signaling<br>pathway<br>(GO:0019221)<br>)<br>p = 3.958E-<br>11<br>positive<br>regulation of<br>T cell<br>activation<br>(GO:0050870)<br>)<br>p = 3.400E-5<br>interferon-<br>gamma-<br>mediated<br>signaling<br>pathway<br>(GO:0060333)<br>)<br>p = 0.0013<br>regulation of<br>T-helper 1<br>cell<br>differentiation<br>(GO:0045625)<br>) |

|   |                                                               |  |                                                                                                                                                                                                                                                                                                                                               |                                                                                                                                                                                                                                                                                                                                       |                                                                                                                                                                                                                                                                |                                                                                                                                                              |
|---|---------------------------------------------------------------|--|-----------------------------------------------------------------------------------------------------------------------------------------------------------------------------------------------------------------------------------------------------------------------------------------------------------------------------------------------|---------------------------------------------------------------------------------------------------------------------------------------------------------------------------------------------------------------------------------------------------------------------------------------------------------------------------------------|----------------------------------------------------------------------------------------------------------------------------------------------------------------------------------------------------------------------------------------------------------------|--------------------------------------------------------------------------------------------------------------------------------------------------------------|
|   |                                                               |  |                                                                                                                                                                                                                                                                                                                                               |                                                                                                                                                                                                                                                                                                                                       |                                                                                                                                                                                                                                                                | p = 0.0101                                                                                                                                                   |
| 5 |                                                               |  | <p>extracellular matrix organization (GO:0030198)<br/>p = 4.624E-22</p> <p>neutrophil activation involved in immune response (GO:0002283)<br/>p = 8.09E-10</p> <p>cytokine-mediated signaling pathway (GO:0019221)<br/>p = 1.743E-7</p> <p>antigen processing and presentation of exogenous peptide antigen (GO:0002478)<br/>p = 4.448E-4</p> | <p>extracellular structure organization (GO:0043062)<br/>p = 1.03E-16</p> <p>cytokine-mediated signaling pathway (GO:0019221)<br/>p = 0.0052</p> <p>neutrophil activation involved in immune response (GO:0002283)<br/>p = 0.025</p> <p>cellular response to transforming growth factor beta stimulus (GO:0071560)<br/>p = 0.0390</p> | <p>cellular response to type I interferon (GO:0071357)<br/>p = 3.70E-4</p> <p>negative regulation of transforming growth factor beta production (GO:0071635)<br/>p = 0.0020</p> <p>regulation of cell population proliferation (GO:0042127)<br/>p = 0.0093</p> | <p>extracellular matrix organization (GO:0030198)<br/>)<br/>p = 4.65E-11</p> <p>cellular response to cytokine stimulus (GO:0071345)<br/>)<br/>p = 0.0060</p> |
| 6 | <p>fatty acid beta-oxidation (GO:0006635)<br/>p = 5.31E-4</p> |  | <p>extracellular matrix organization (GO:0030198)<br/>p = 2.92E-8</p> <p>neutrophil activation involved in immune response (GO:0002283)<br/>p = 5.32E-7</p> <p>negative regulation of cell migration (GO:0030336)<br/>p = 5.32E-7</p> <p>cytokine-mediated signaling pathway (GO:0019221)<br/>p = 3.76E-5</p>                                 | <p>extracellular matrix organization (GO:0030198)<br/>p = 1.874E-9</p>                                                                                                                                                                                                                                                                | <p>extracellular matrix organization (GO:0030198)<br/>p = 3.03E-12</p> <p>cellular response to cytokine stimulus (GO:0071345)<br/>p = 6.760E-11</p> <p>antigen receptor-mediated signaling pathway (GO:0050851)<br/>p = 2.788E-6</p>                           | <p>epithelium development (GO:0060429)<br/>)<br/>p = 0.011</p> <p>negative regulation of programmed cell death (GO:0043069)<br/>)<br/>p = 0.035</p>          |

|   |                                                           |  |                                                                                                                                                                                                                                                               |                                                                                                                                                                                                                       |                                                                                                                                                                                                           |  |
|---|-----------------------------------------------------------|--|---------------------------------------------------------------------------------------------------------------------------------------------------------------------------------------------------------------------------------------------------------------|-----------------------------------------------------------------------------------------------------------------------------------------------------------------------------------------------------------------------|-----------------------------------------------------------------------------------------------------------------------------------------------------------------------------------------------------------|--|
| 7 | fatty acid beta-oxidation<br>(GO:0006635)<br>p = 7.634E-6 |  | cytokine-mediated signaling<br>pathway (GO:0019221)<br>p = 9.42E-7<br>negative regulation of intrinsic<br>apoptotic signaling pathway<br>(GO:2001243)<br>p = 4.011E-6<br>neutrophil activation involved<br>in immune response<br>(GO:0002283)<br>p = 4.011E-6 | extracellular matrix<br>organization<br>(GO:0030198)<br>p = 2.42E-15<br>positive regulation of<br>cytokine production<br>(GO:0001819)<br>p = 4.38E-7<br>regulation of<br>angiogenesis<br>(GO:0045765)<br>p = 1.267E-5 | extracellular matrix<br>organization (GO:0030198)<br>p = 2.44E-15<br>neutrophil mediated<br>immunity (GO:0002446)<br>p = 6.69E-9<br>positive regulation of cell<br>migration (GO:0030335)<br>p = 9.175E-5 |  |
| 8 |                                                           |  | negative regulation of RNA<br>polymerase II regulatory<br>region sequence-specific DNA<br>binding (GO:1903026)<br>p = 0.0151                                                                                                                                  |                                                                                                                                                                                                                       | positive regulation of wound<br>healing (GO:0090303)<br>p = 0.0225<br>regulation of cell migration<br>(GO:0030334)<br>p = 0.0491                                                                          |  |
| 9 |                                                           |  | regulation of immune effector<br>process (GO:0002697)<br>p = 0.0030<br>positive regulation of immune<br>response (GO:0050778)<br>p = 0.0042<br>adipose tissue development<br>(GO:0060612)<br>p = 0.0044                                                       |                                                                                                                                                                                                                       | extracellular matrix<br>organization (GO:0030198)<br>p = 1.269E-6<br>endothelium development<br>(GO:0003158)<br>p = 0.00270                                                                               |  |
